# Supplementary material for: Dynamics of structural diffusion in phosphoric acid hydrogen-bond clusters
Source: Royal Society of Chemistry journal article supplement (doi:10.1039/c7ra01829k), 2017-01-01
Supplement: c7ra01829k1.pdf [file c7ra01829k1.pdf]

***Electronic Supplementary Information (ESI)***  
***for***  
***Dynamics of Structural Diffusion in Phosphoric Acid***  
***Hydrogen-Bond Clusters***

*Parichart Suwannakham and Kritsana Sagarik\**

*School of Chemistry, Institute of Science, Suranaree University of Technology*  
*Nakhon Ratchasima 30000*  
*Thailand*

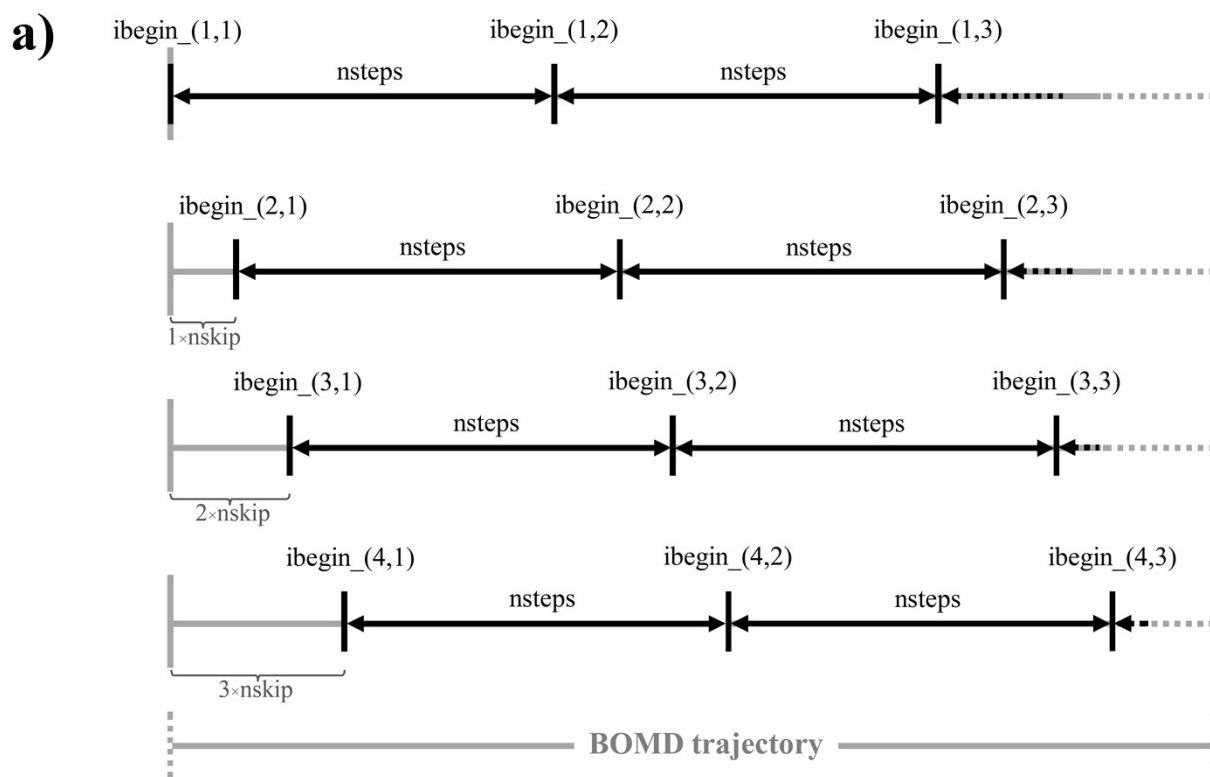

**Figure S1** a) Overlap data collection method used in the analyses of time-dependent properties, in which measurements at any instant contribute several sets of samples.<sup>40</sup>  
 $nskip$  = equally spaced time origin;  $ibegin_{(m,n)}$  = time origin;  $nsteps$  = constant overlapped interval.

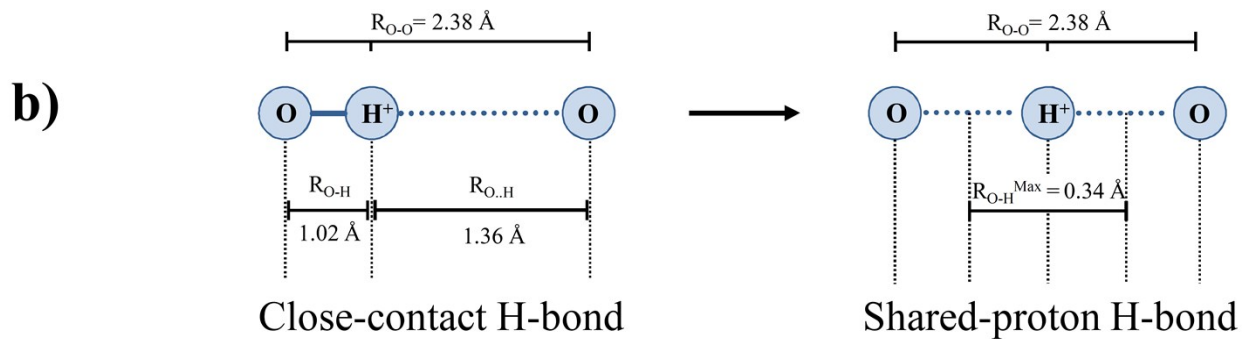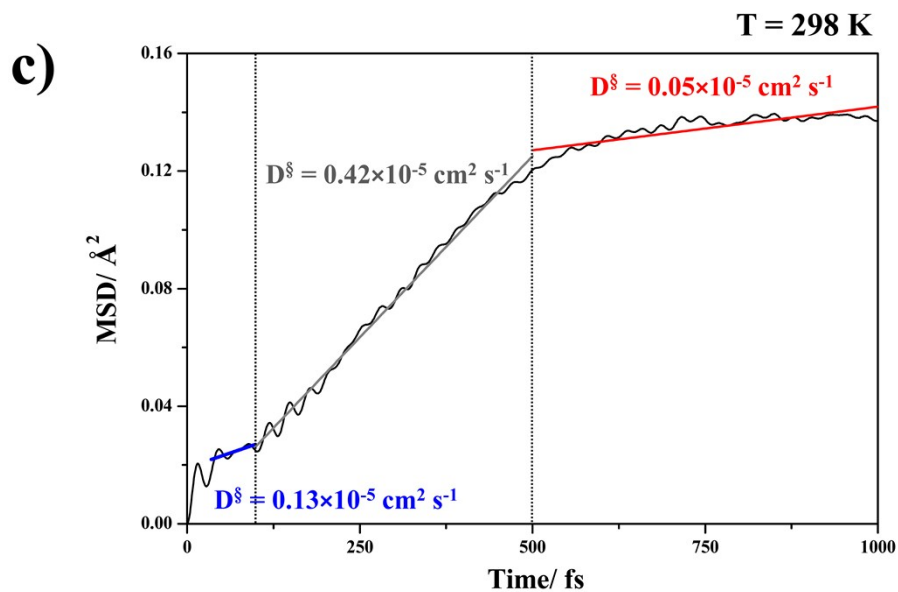

**Figure S1** (cont.) b) Maximum possible shuttling distance ( $R_{\text{O-H}}^{\text{Max}}$ ) of a proton confined in  $\text{O-H}^+ \cdots \text{O}$  H-bond.  
 c) Example of MSD plot for an exchanging proton in protonated  $\text{H}_3\text{PO}_4$  H-bond obtained from NVT-BOMD simulation at 298 K.

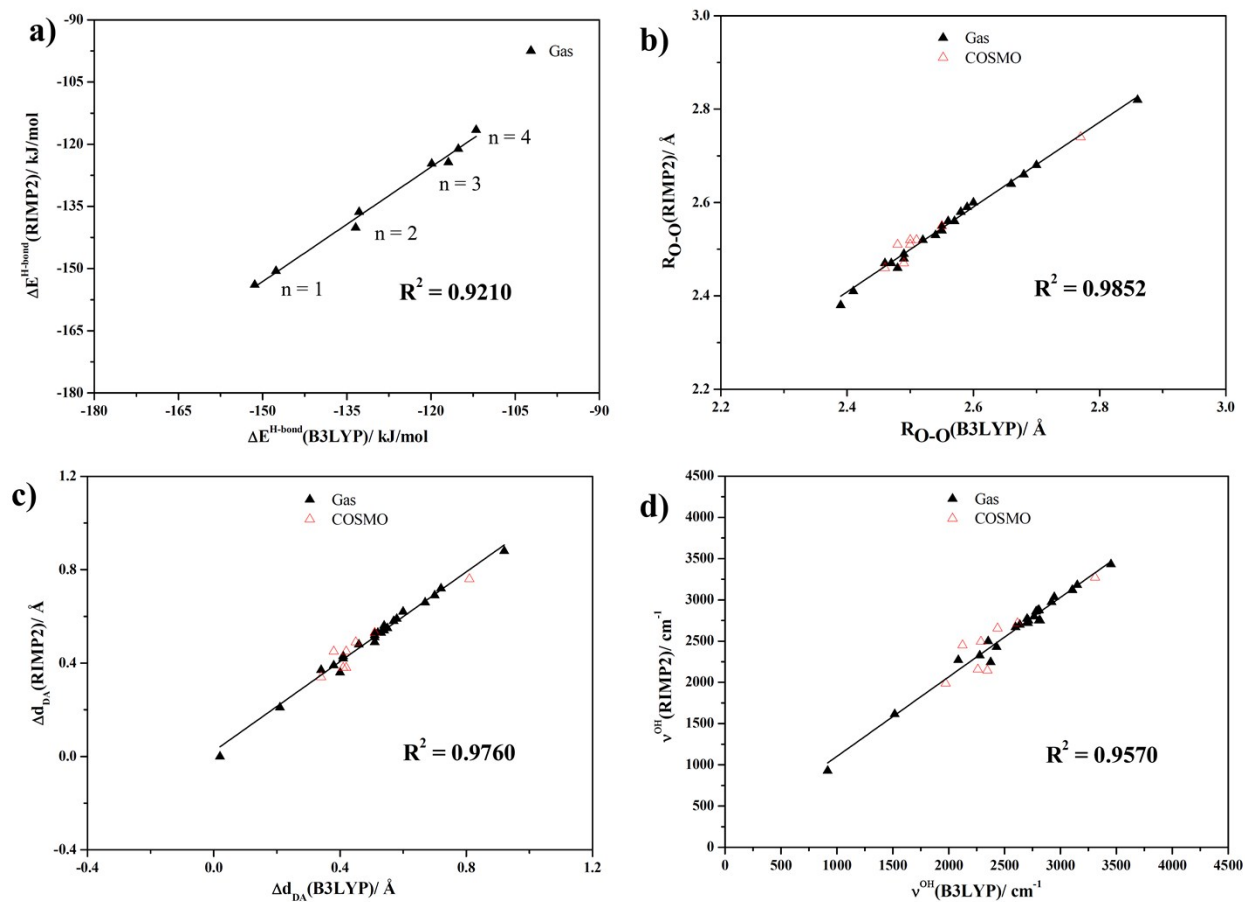

**Figure S2** Correlations ( $R^2$ ) of the static results of  $\text{H}^+(\text{H}_3\text{PO}_4)_n$  ( $n = 2-5$ ) obtained from RIMP2/TZVP and B3LYP/TZVP calculations in the gas phase ( $\epsilon = 1$ ) and in continuum solvent ( $\epsilon = 61$ ).

- a) Interaction energy per H-bond ( $\Delta E^{\text{H-bond}}$ ).
- b)  $\text{R}_{\text{O-O}}$  distance.
- c) Asymmetric stretching coordinate ( $\Delta d_{\text{DA}}$ ).
- d) Asymmetric O-H stretching frequency ( $\nu^{\text{OH}}$ ).

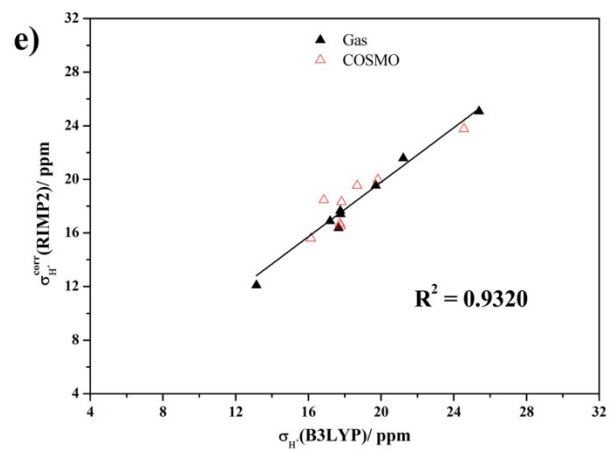

Figure S2 (cont.) e) Isotropic shielding constant ( $\sigma_{\text{H}}^{\text{isr}}$ ).

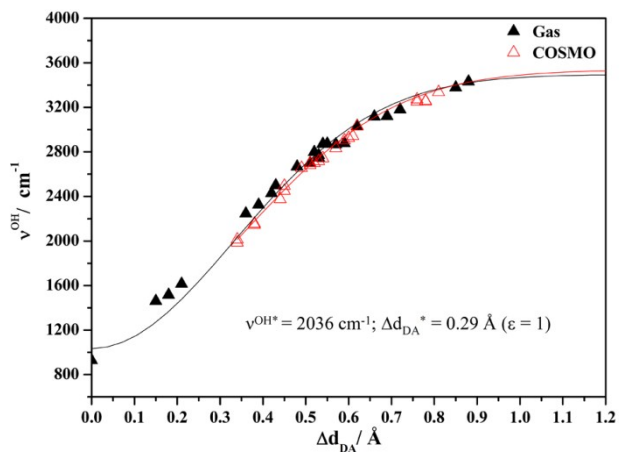

**Figure S3** Plots of asymmetric O-H stretching frequencies ( $\nu^{\text{OH}}$ ) and asymmetric stretching coordinates ( $\Delta d_{\text{DA}}$ ) of protonated H-bonds in  $\text{H}^+(\text{H}_3\text{PO}_4)_n$  ( $n = 2-5$ ) obtained from RIMP2/TZVP calculations.  $\nu^{\text{OH}*}$  = threshold asymmetric O-H stretching frequency;  $\Delta d_{\text{DA}}^*$  = threshold asymmetric stretching coordinate.

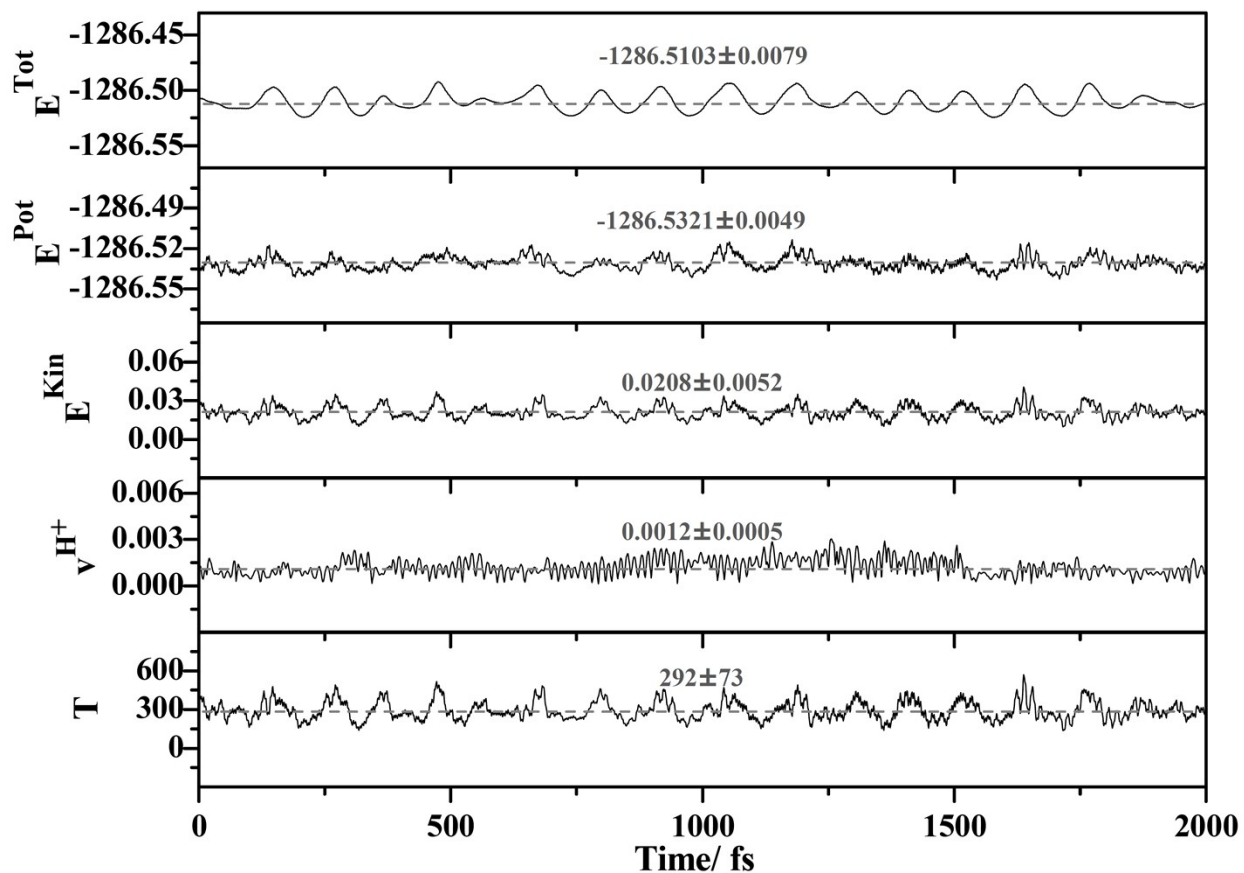

**Figure S4** Energy conservation and velocity plots obtained from NVT-BOMD simulations on  $\text{H}^+(\text{H}_3\text{PO}_4)_2$  at 298 K. Energies and velocity are in au.  $E^{\text{Tot}}$ ,  $E^{\text{Pot}}$  and  $E^{\text{Kin}}$  = total, potential and kinetic energies, respectively;  $v^{\text{H}^+}$  = velocity of the exchanging proton;  $T$  = temperature.

$$\epsilon = 1$$

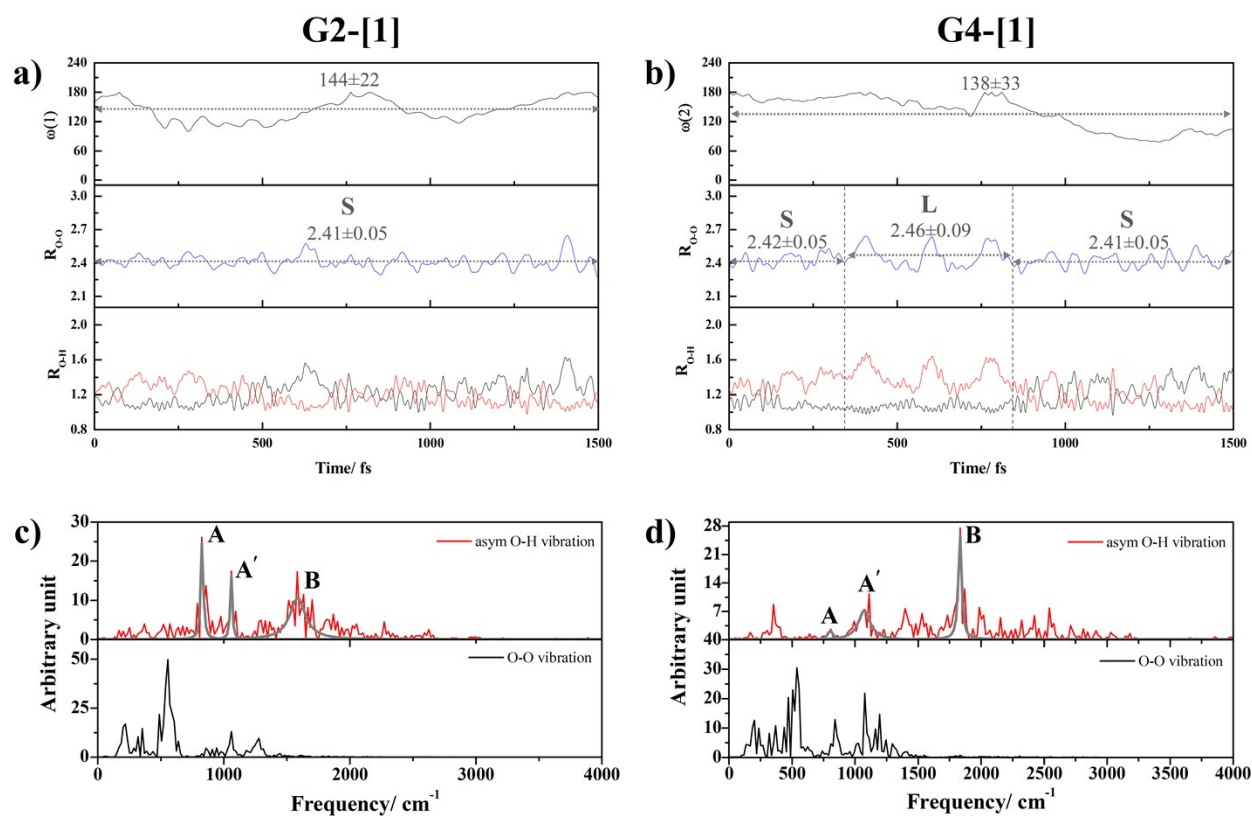

**Figure S5** a) – b) Proton transfer profiles and time evolutions of the dihedral angles of H-bonds (1) and (2) in  $H^+(H_3PO_4)_2$  and  $H^+(H_3PO_4)_4$  obtained from NVT-BOMD simulations in low local-dielectric environment at 298 K, respectively.

c) – d) Vibrational spectra of H-bonds (1) and (2) in  $H^+(H_3PO_4)_2$  and  $H^+(H_3PO_4)_4$  obtained from NVT-BOMD simulations in low local-dielectric environment at 298 K, respectively.  $R_{O-O}$  and  $R_{O-H}$  are in Å and  $\omega(1)$  and  $\omega(2)$  are in degrees; L and S = large-amplitude and small-amplitude O-O vibrations, respectively; A and A' = oscillatory shuttling peaks; B = structural diffusion peak.



$$\epsilon = 61$$

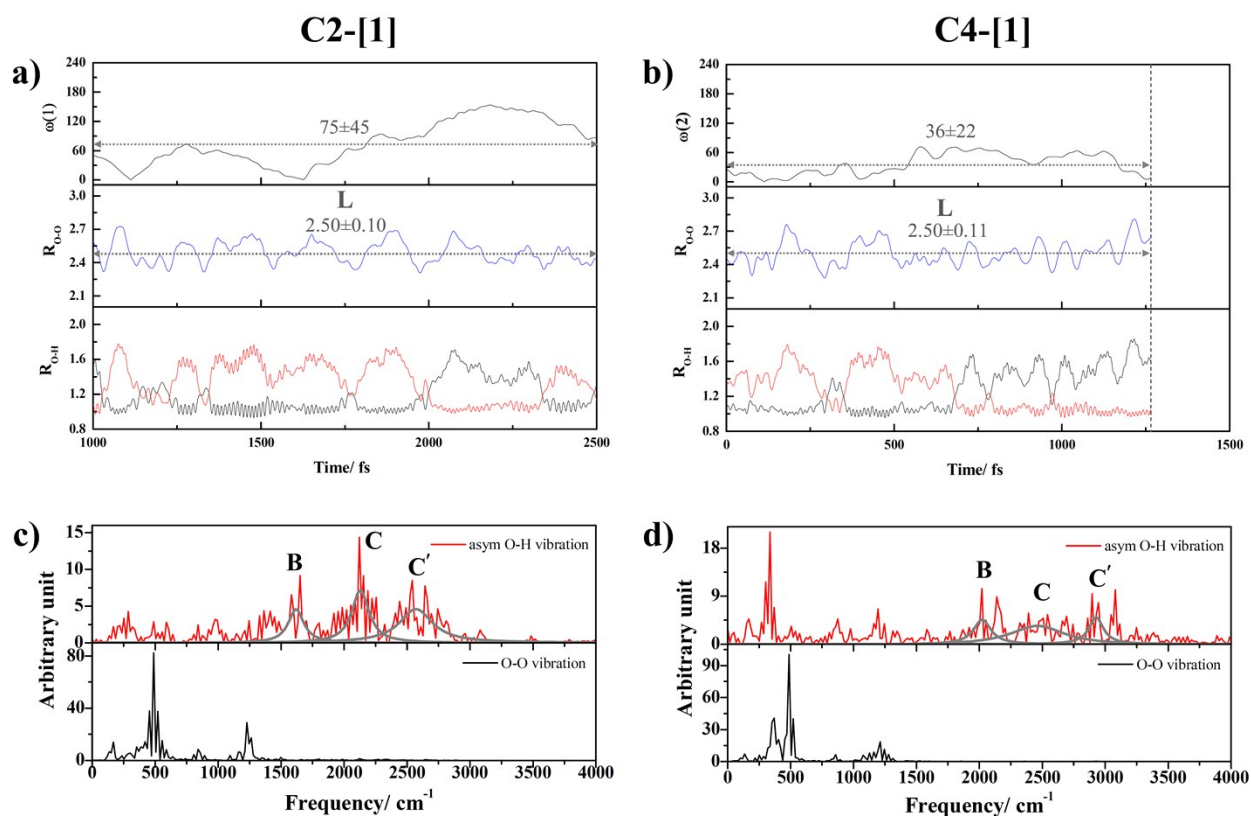

**Figure S6** a) – b) Proton transfer profiles and time evolutions of the dihedral angles of H-bonds **(1)** and **(2)** in  $H^+(H_3PO_4)_2$  and  $H^+(H_3PO_4)_4$  obtained from NVT-BOMD simulations in high local-dielectric environment at 298 K, respectively.

c) – d) Vibrational spectra of H-bonds **(1)** and **(2)** in  $H^+(H_3PO_4)_2$  and  $H^+(H_3PO_4)_4$  obtained from NVT-BOMD simulations in high local-dielectric environment at 298 K, respectively.  $R_{O-O}$  and  $R_{O-H}$  are in Å and  $\omega(1)$  and  $\omega(2)$  in degrees; **L** and **S** = large-amplitude and small-amplitude O-O vibrations, respectively; **B** = structural diffusion peak; **C** and **C'** = characteristic peaks of proton in double-well potential.

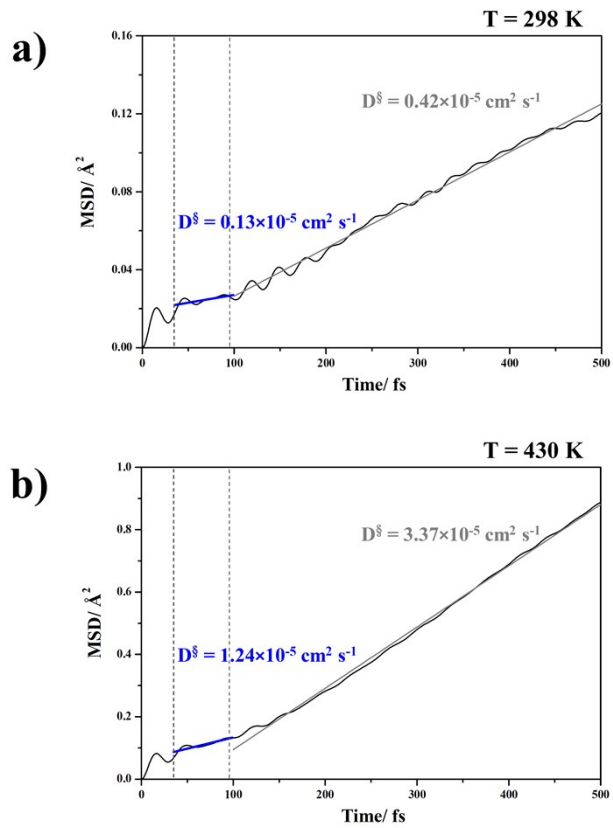

**Figure S7** a) – b) Examples of the MSD plots of the exchanging proton obtained from NVT-BOMD simulations on  $\text{H}^+(\text{H}_3\text{PO}_4)_2$ .

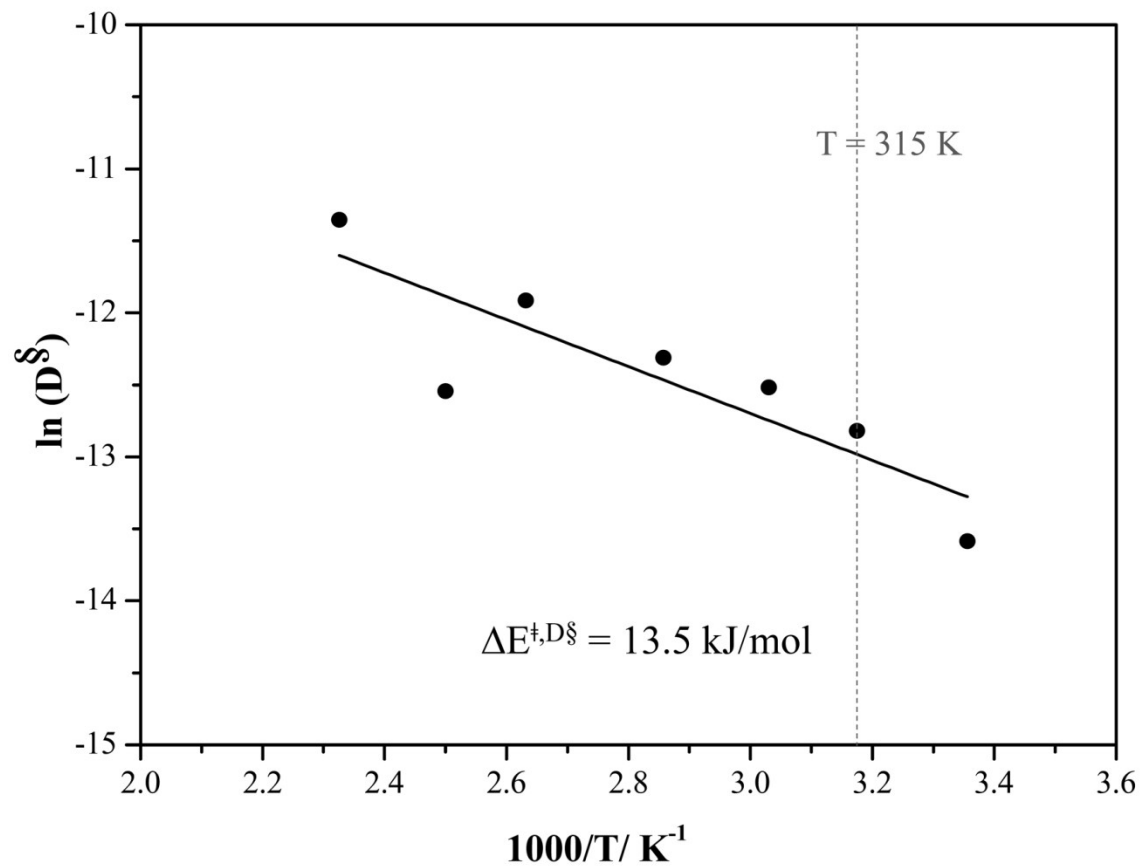

**Figure S8** Plots of the natural log of the self-diffusion coefficients ( $D_s$ ) as a function of  $1000/T$ .  $\Delta E^{\ddagger, D_s}$  = activation energy obtained from the simple Arrhenius equation (Eqn (2)).

**Table S1** Static Results of  $\text{H}^+(\text{H}_3\text{PO}_4)_n$  ( $n = 2-5$ ) Obtained from RIMP2/TZVP Calculations.<sup>a</sup>

| Gas                                                                                | COSMO                                                                               | $\Delta E^{\text{Tot}}$ | $\Delta E^{\text{sol}}$ | H-bond | $R_{\text{O-O}}$ | $\Delta d_{\text{DA}}$ | $\nu^{\text{OH}}$ | $\sigma_{\text{H}^+}^{\text{corr}}$ | $\delta_{\text{H}^+}^{\text{corr}}$ | $\omega$ |
|------------------------------------------------------------------------------------|-------------------------------------------------------------------------------------|-------------------------|-------------------------|--------|------------------|------------------------|-------------------|-------------------------------------|-------------------------------------|----------|
| G2-[1]                                                                             | C                                                                                   | -153.9                  | -                       | (1)*   | 2.38             | 0.00                   | 928               | 12.10                               | 19.86                               | 161      |
| 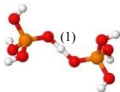  |                                                                                     | -                       |                         |        |                  |                        |                   |                                     |                                     |          |
| G2-[2]                                                                             | C2-[2]                                                                              | -150.6                  | -284.0                  | (1)*   | 2.39             | 0.18                   | 1516              | 13.20                               | 18.76                               | 20       |
|   |    | -50.5                   |                         | (1)*   | 2.46             | 0.34                   | 1986              | 15.60                               | 16.36                               | 35       |
| G3-[1]                                                                             | C3-[1]                                                                              | -280.3                  | -288.0                  | (1)    | 2.60             | 0.62                   | 3033              | 21.58                               | 10.38                               | 2        |
|    |    | -101.4                  |                         | (2)    | 2.46             | 0.36                   | 2246              | 16.36                               | 15.60                               | 170      |
|                                                                                    |                                                                                     |                         |                         | (1)    | 2.55             | 0.53                   | 2718              | 19.99                               | 11.97                               | 4        |
|                                                                                    |                                                                                     |                         |                         | (2)    | 2.47             | 0.38                   | 2156              | 16.69                               | 15.27                               | 37       |
| G3-[2]                                                                             | C3-[2]                                                                              | -272.7                  | -294.4                  | (1)    | 2.48             | 0.42                   | 2428              | 17.41                               | 14.55                               | 56       |
|   |   | -100.2                  |                         | (2)    | 2.49             | 0.43                   | 2500              | 17.65                               | 14.31                               | 67       |
|                                                                                    |                                                                                     |                         |                         | (1)    | 2.48             | 0.38                   | 2146              | 18.32                               | 13.64                               | 157      |
|                                                                                    |                                                                                     |                         |                         | (2)    | 2.50             | 0.45                   | 2495              | 16.53                               | 15.43                               | 78       |
| G4-[1]                                                                             | C4-[1]                                                                              | -373.1                  | -                       | (1)    | 2.55             | 0.53                   | 2854              | -                                   | -                                   | 47       |
|  |                                                                                     |                         |                         | (2)*   | 2.39             | 0.15                   | 1460              | -                                   | -                                   | 178      |
|                                                                                    |                                                                                     |                         |                         | (3)    | 2.52             | 0.54                   | 2712              | -                                   | -                                   | 52       |
|                                                                                    |                                                                                     | -                       |                         |        |                  |                        |                   |                                     |                                     |          |
| G4-[2]                                                                             | C4-[2]                                                                              | -374.0                  | -311.5                  | (1)    | 2.56             | 0.54                   | 2871              | -                                   | -                                   | 49       |
|  |                                                                                     |                         |                         | (2)*   | 2.41             | 0.21                   | 1615              | -                                   | -                                   | 11       |
|                                                                                    |                                                                                     |                         |                         | (3)    | 2.52             | 0.48                   | 2668              | -                                   | -                                   | 59       |
|                                                                                    |                                                                                     | -135.6                  |                         | (1)    | 2.56             | 0.54                   | 2871              | -                                   | -                                   | 18       |
|                                                                                    |  |                         |                         | (2)    | 2.45             | 0.38                   | 2156              | -                                   | -                                   | 26       |
|                                                                                    |                                                                                     |                         |                         | (3)    | 2.50             | 0.44                   | 2376              | -                                   | -                                   | 27       |

<sup>a</sup> Energies, distances, vibrational frequencies and torsional angles are in kJ/mol, Å,  $\text{cm}^{-1}$  and degrees, respectively. Isotropic shielding constants and  $^1\text{H}$  NMR chemical shifts are in ppm.  $\Delta E^{\text{Tot}}$  = total interaction energy;  $\Delta E^{\text{sol}}$  = solvation energy;  $R_{\text{O-O}}$  = H-bond distance;  $\Delta d_{\text{DA}}$  = asymmetric stretching coordinate;  $\nu^{\text{OH}}$  = asymmetric O-H stretching frequency;  $\sigma_{\text{H}^+}^{\text{corr}}$  = isotropic shielding constant;  $\delta_{\text{H}^+}^{\text{corr}}$  =  $^1\text{H}$  NMR chemical shift;  $\omega$  = torsional angle of H-bond; COSMO = continuum aqueous solution; \* = H-bond susceptible to proton exchange.

**Table S1** (cont.)

| Gas                                                                                         | COSMO | $\Delta E^{\text{Tot}}$ | $\Delta E^{\text{sol}}$ | H-bond | $R_{\text{O-O}}$ | $\Delta d_{\text{DA}}$ | $\nu^{\text{OH}}$ | $\sigma_{\text{H}^+}^{\text{corr}}$ | $\delta_{\text{H}^+}^{\text{corr}}$ | $\omega$ |
|---------------------------------------------------------------------------------------------|-------|-------------------------|-------------------------|--------|------------------|------------------------|-------------------|-------------------------------------|-------------------------------------|----------|
| G5-[1]<br>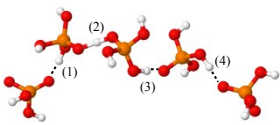 | -     | -466.1                  | -                       | (1)    | 2.52             | 0.49                   | 2930              | -                                   | -                                   | 50       |
|                                                                                             |       |                         |                         | (2)*   | 2.39             | 0.15                   | 1920              | -                                   | -                                   | 176      |
|                                                                                             |       |                         |                         | (3)    | 2.55             | 0.53                   | 2231              | -                                   | -                                   | 35       |
|                                                                                             |       |                         |                         | (4)    | 2.48             | 0.58                   | 2913              | -                                   | -                                   | 158      |
|                                                                                             |       |                         |                         |        |                  |                        |                   |                                     |                                     |          |
| G5-[2]<br> | -     | -484.5                  | -                       | (1)    | 2.58             | 0.58                   | 2974              | -                                   | -                                   | 54       |
|                                                                                             |       |                         |                         | (2)    | 2.53             | 0.49                   | 2721              | -                                   | -                                   | 13       |
|                                                                                             |       |                         |                         | (3)    | 2.56             | 0.56                   | 2860              | -                                   | -                                   | 40       |
|                                                                                             |       |                         |                         | (4)    | 2.47             | 0.37                   | 2270              | -                                   | -                                   | 20       |
|                                                                                             |       |                         |                         |        |                  |                        |                   |                                     |                                     |          |

**Table S2** Static Results of  $\text{H}^+(\text{H}_3\text{PO}_4)_n$  ( $n = 2-5$ ) Obtained from B3LYP/TZVP Calculations.<sup>a</sup>

| Gas                                                                                 | COSMO                                                                              | $\Delta E^{\text{Tot}}$ | $\Delta E^{\text{sol}}$ | H-bond | $R_{\text{O-O}}$ | $\Delta d_{\text{DA}}$ | $\nu^{\text{OH}}$ | $\sigma_{\text{H}^+}$ | $\delta_{\text{H}^+}$ | $\omega$ |
|-------------------------------------------------------------------------------------|------------------------------------------------------------------------------------|-------------------------|-------------------------|--------|------------------|------------------------|-------------------|-----------------------|-----------------------|----------|
| G2-[1]                                                                              |                                                                                    | -151.4                  | -                       | (1)    | 2.39             | 0.02                   | 919               | 13.14                 | 18.78                 | 161      |
| 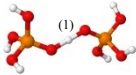   |                                                                                    | -                       |                         |        |                  |                        |                   |                       |                       |          |
| G2-[2]                                                                              | C2-[2]                                                                             | -147.6                  | -280.0                  | (1)    | 2.39             | 0.12                   | 1396              | 13.59                 | 18.33                 | 7        |
|    |   | -46.2                   |                         | (1)    | 2.46             | 0.34                   | 1937              | 16.14                 | 15.78                 | 45       |
| G3-[1]                                                                              | C3-[1]                                                                             | -266.8                  | -287.4                  | (1)    | 2.60             | 0.60                   | 2944              | 21.22                 | 14.26                 | 1        |
|    |   | -86.9                   |                         | (2)    | 2.48             | 0.40                   | 2376              | 17.66                 | 10.70                 | 52       |
|                                                                                     |                                                                                    |                         |                         | (1)    | 2.55             | 0.51                   | 2616              | 19.83                 | 12.09                 | 14       |
|                                                                                     |                                                                                    |                         |                         | (2)    | 2.49             | 0.41                   | 2261              | 17.74                 | 14.18                 | 24       |
| G3-[2]                                                                              | C3-[2]                                                                             | -265.6                  | -278.1                  | (1)    | 2.49             | 0.41                   | 2429              | 17.76                 | 14.16                 | 84       |
|   |  | -76.0                   |                         | (2)    | 2.49             | 0.41                   | 2353              | 17.77                 | 14.15                 | 95       |
|                                                                                     |                                                                                    |                         |                         | (1)    | 2.50             | 0.42                   | 2346              | 17.82                 | 14.10                 | 22       |
|                                                                                     |                                                                                    |                         |                         | (2)    | 2.50             | 0.42                   | 2289              | 17.79                 | 14.13                 | 3        |
| G4-[1]                                                                              |                                                                                    | -350.7                  | -                       | (1)    | 2.69             | 0.75                   | 3139              | 27.84                 | 4.08                  | 144      |
|  |                                                                                    |                         |                         | (2)    | 2.41             | 0.07                   | 1358              | 16.31                 | 15.61                 | 161      |
|                                                                                     |                                                                                    |                         |                         | (3)    | 2.52             | 0.44                   | 2415              | 20.35                 | 11.57                 | 145      |
|                                                                                     |                                                                                    | -                       |                         |        |                  |                        |                   |                       |                       |          |
| G4-[2]                                                                              | C4-[2]                                                                             | -359.6                  | -                       | (1)    | 2.52             | 0.46                   | 2598              | 20.18                 | 11.74                 | 87       |
|  |                                                                                    |                         |                         | (2)    | 2.41             | 0.21                   | 1518              | 14.26                 | 17.66                 | 64       |
|                                                                                     |                                                                                    |                         |                         | (3)    | 2.56             | 0.54                   | 2797              | 18.93                 | 12.99                 | 80       |
|                                                                                     |                                                                                    | -                       |                         |        |                  |                        |                   |                       |                       |          |

<sup>a</sup> Energies, distances, vibrational frequencies and torsional angles are in kJ/mol, Å,  $\text{cm}^{-1}$  and degrees, respectively. Isotropic shielding constants and  $^1\text{H}$  NMR chemical shifts are in ppm.  $\Delta E^{\text{Tot}}$  = total interaction energy;  $\Delta E^{\text{sol}}$  = solvation energy;  $R_{\text{O-O}}$  = H-bond distance;  $\Delta d_{\text{DA}}$  = asymmetric stretching coordinate;  $\nu^{\text{OH}}$  = asymmetric O-H stretching frequency;  $\sigma_{\text{H}^+}$  = isotopic shielding constant;  $\delta_{\text{H}^+}$  =  $^1\text{H}$  NMR chemical shift;  $\omega$  = torsional angle of H-bond; COSMO = continuum aqueous solution; \* = H-bond susceptible to proton exchange.

**Table S2** (cont.)

| Gas                                                                               | COSMO | $\Delta E^{\text{Tot}}$ | $\Delta E^{\text{sol}}$ | H-bond | $R_{\text{O-O}}$ | $\Delta d_{\text{DA}}$ | $\nu^{\text{OH}}$ | $\sigma_{\text{H}^+}^{\text{corr}}$ | $\delta_{\text{H}^+}^{\text{corr}}$ | $\omega$ |
|-----------------------------------------------------------------------------------|-------|-------------------------|-------------------------|--------|------------------|------------------------|-------------------|-------------------------------------|-------------------------------------|----------|
| G5-[1]                                                                            |       | -447.8                  | -                       | (1)    | 2.58             | 0.56                   | 2870              | -                                   | -                                   | 70       |
| 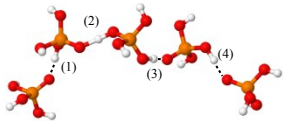 |       |                         |                         | (2)    | 2.43             | 0.27                   | 1792              | -                                   | -                                   | 165      |
|                                                                                   |       |                         |                         | (3)    | 2.46             | 0.34                   | 2117              | -                                   | -                                   | 55       |
|                                                                                   |       |                         |                         | (4)    | 2.58             | 0.56                   | 2894              | -                                   | -                                   | 173      |
|                                                                                   |       | -                       |                         |        |                  |                        |                   |                                     |                                     |          |
| G5-[2]                                                                            |       | -460.5                  | -                       | (1)    | 2.54             | 0.51                   | 2710              | -                                   | -                                   | 20       |
|   |       |                         |                         | (2)    | 2.57             | 0.54                   | 2782              | -                                   | -                                   | 40       |
|                                                                                   |       |                         |                         | (3)    | 2.46             | 0.34                   | 2087              | -                                   | -                                   | 14       |
|                                                                                   |       |                         |                         | (4)    | 2.58             | 0.57                   | 2920              | -                                   | -                                   | 55       |
|                                                                                   |       | -                       |                         |        |                  |                        |                   |                                     |                                     |          |

**Table S3** Example of Static Results of  $(\text{H}_3\text{PO}_4)_n$  ( $n = 2-3$ ) Obtained from RIMP2/TZVP Calculations.<sup>a</sup>

| Gas                                                                                 | COSMO                                                                               | $\Delta E^{\text{Tot}}$ | $\Delta E^{\text{sol}}$ | H-bond | $R_{\text{O-O}}$ | $\Delta d_{\text{DA}}$ | $\nu^{\text{OH}}$ | $\sigma_{\text{H}}^{\text{corr}}$ | $\delta_{\text{H}}^{\text{corr}}$ | $\omega$ |
|-------------------------------------------------------------------------------------|-------------------------------------------------------------------------------------|-------------------------|-------------------------|--------|------------------|------------------------|-------------------|-----------------------------------|-----------------------------------|----------|
| G2-[3]                                                                              | C2-[3]                                                                              | -137.4                  | -99.3                   | (1)    | 2.58             | 0.57                   | 2867              | 20.74                             | 11.22                             | 11       |
| 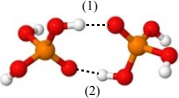   |    |                         |                         | (2)    | 2.58             | 0.57                   | 2867              | 20.88                             | 11.08                             | 11       |
|                                                                                     |                                                                                     | -66.1                   |                         | (1)    | 2.59             | 0.57                   | 2832              | 20.74                             | 11.22                             | 21       |
|                                                                                     |                                                                                     |                         |                         | (2)    | 2.58             | 0.57                   | 2832              | 20.71                             | 11.25                             | 38       |
| G3-[3]                                                                              | C3-[3]                                                                              | -198.3                  | -142.4                  | (1)    | 2.54             | 0.53                   | 2771              | 20.00                             | 11.96                             | 82       |
|    |    |                         |                         | (2)    | 2.68             | 0.72                   | 3181              | 22.83                             | 9.13                              | 107      |
|                                                                                     |                                                                                     |                         |                         | (3)    | 2.64             | 0.66                   | 3118              | 22.39                             | 9.57                              | 27       |
|                                                                                     |                                                                                     | -84.8                   |                         | (1)    | 2.54             | 0.51                   | 2700              | 11.98                             | 12.12                             | 80       |
|                                                                                     |                                                                                     |                         |                         | (2)    | 2.74             | 0.78                   | 3257              | 23.62                             | 8.34                              | 102      |
|                                                                                     |                                                                                     |                         |                         | (3)    | 2.60             | 0.60                   | 2925              | 21.65                             | 10.31                             | 20       |
| G3-[4]                                                                              | C3-[4]                                                                              | -225.5                  | -162.9                  | (1)    | 2.55             | 0.53                   | 2750              | 19.79                             | 12.17                             | 72       |
|    |    |                         |                         | (2)    | 2.55             | 0.53                   | 2750              | 19.85                             | 12.11                             | 67       |
|                                                                                     |                                                                                     |                         |                         | (3)    | 2.55             | 0.53                   | 2750              | 19.92                             | 12.04                             | 69       |
|                                                                                     |                                                                                     | -132.6                  |                         | (1)    | 2.62             | 0.62                   | 3029              | 22.56                             | 9.40                              | 1        |
|                                                                                     |                                                                                     |                         |                         | (2)    | 2.60             | 0.61                   | 2943              | 21.67                             | 10.29                             | 73       |
|                                                                                     |                                                                                     |                         |                         | (3)    | 2.55             | 0.52                   | 2700              | 19.66                             | 12.30                             | 39       |
| G3-[5]                                                                              | C3-[5]                                                                              | -242.8                  | -121.6                  | (1)    | 2.54             | 0.51                   | 2699              | 19.37                             | 12.59                             | 5        |
|  |  |                         |                         | (2)    | 2.56             | 0.55                   | 2873              | 20.28                             | 11.68                             | 18       |
|                                                                                     |                                                                                     |                         |                         | (3)    | 2.74             | 0.88                   | 3399              | 25.60                             | 6.36                              | 80       |
|                                                                                     |                                                                                     | -108.5                  |                         | (1)    | 2.55             | 0.51                   | 2682              | 19.49                             | 12.47                             | 4        |
|                                                                                     |                                                                                     |                         |                         | (2)    | 2.59             | 0.59                   | 2904              | 20.65                             | 11.31                             | 13       |
|                                                                                     |                                                                                     |                         |                         | (3)    | 2.74             | 0.89                   | 3342              | 25.66                             | 6.30                              | 80       |

<sup>a</sup> Energies, distances, vibrational frequencies and torsional angles are in kJ/mol, Å,  $\text{cm}^{-1}$  and degrees, respectively. Isotropic shielding constants and  $^1\text{H}$  NMR chemical shifts are in ppm.  $\Delta E^{\text{Tot}}$  = total interaction energy;  $\Delta E^{\text{sol}}$  = solvation energy;  $R_{\text{O-O}}$  = H-bond distance;  $\Delta d_{\text{DA}}$  = asymmetric stretching coordinate;  $\nu^{\text{OH}}$  = asymmetric O-H stretching frequency;  $\sigma_{\text{H}}^{\text{corr}}$  = isotropic shielding constant;  $\delta_{\text{H}^+}^{\text{corr}}$  =  $^1\text{H}$  NMR chemical shift;  $\omega$  = torsional angle of H-bond; COSMO = continuum aqueous solution.



**Table S4** Drifts in Energies and Velocity of the Exchanging Proton Obtained from NVT-BOMD Simulations on  $\text{H}^+(\text{H}_3\text{PO}_4)_2$  at 298 K.<sup>a</sup>

| <b>A</b>         | <b><math>\delta_A</math></b> | <b><math>\langle A \rangle</math></b> | <b><math>\sigma_A</math></b> |
|------------------|------------------------------|---------------------------------------|------------------------------|
| $E^{\text{Tot}}$ | 0.0260                       | -1286.5103                            | 0.0079                       |
| $E^{\text{Pot}}$ | 0.0698                       | -1286.5312                            | 0.0049                       |
| $E^{\text{Kin}}$ | 0.0406                       | 0.0208                                | 0.0052                       |
| $v^{\text{H}^+}$ | 0.1246                       | 0.0012                                | 0.0005                       |
| T                | 0.0407                       | 292.4317                              | 73.0601                      |

<sup>a</sup> Energies and velocity are in atomic unit (au) and temperature in K.  $\delta_A$  = drift of property A;  $\langle A \rangle$  = average of property A;  $\sigma_A$  = SD of property A;  $E^{\text{Tot}}$  = total energy;  $E^{\text{Pot}}$  = potential energy;  $E^{\text{Kin}}$  = kinetic energy;  $v^{\text{H}^+}$  = velocity of proton; T = temperature.

**Table S5** Self-Diffusion Coefficients (D) of the Exchanging Proton Obtained from NVT-BOMD Simulations on  $\text{H}^+(\text{H}_3\text{PO}_4)_2$  over the Temperature (T) Range of 298–430 K.<sup>a</sup>

| T   | D<br>MSD <sup>§</sup><br>( $\times 10^{-5}$ ) | T   | D<br><sup>1</sup> H PFG-NMR*<br>( $\times 10^{-5}$ ) |
|-----|-----------------------------------------------|-----|------------------------------------------------------|
| 298 | 0.12                                          | 298 | 0.04                                                 |
| 315 | 0.27                                          | 310 | 0.07                                                 |
| 330 | 0.36                                          | 330 | 0.14                                                 |
| 350 | 0.45                                          | 350 | 0.23                                                 |
| 380 | 0.67                                          | 380 | 0.46                                                 |
| 400 | 0.66                                          | 400 | 0.66                                                 |
| 430 | 1.16                                          | 420 | 0.90                                                 |

<sup>a</sup> D and T are in  $\text{cm}^2 \text{s}^{-1}$  and K, respectively. \* = values taken from Ref. [11]; § = values obtained from the MSD plots.

**Table S6**  $^1\text{H}$  NMR Chemical Shifts, Line Widths and the Areas under the Lorentzian Peak Functions **A**, **A'** and **B** obtained from NVT-BOMD Simulations on  $\text{H}^+(\text{H}_3\text{PO}_4)_2$  over the Temperature Range of 298–430 K.<sup>a</sup>

| T   | Peaks     | $\delta_{\text{H}^+}^{\text{corr,MD}}$ | $\Delta\delta_{\text{H}^+}^{\text{corr,MD}}$ | I  | $\ln(T_2^*)$ |
|-----|-----------|----------------------------------------|----------------------------------------------|----|--------------|
| 298 | <b>A</b>  | 19.78                                  | 0.36                                         | 16 | 13.68        |
|     | <b>A'</b> | 19.19                                  | 0.58                                         | 8  | 13.19        |
|     | <b>B</b>  | 18.41                                  | 0.48                                         | 5  | 13.39        |
| 315 | <b>A</b>  | 19.76                                  | 0.32                                         | 14 | 13.79        |
|     | <b>A'</b> | 19.23                                  | 0.62                                         | 9  | 13.14        |
|     | <b>B</b>  | 17.96                                  | 1.32                                         | 7  | 13.28        |
| 330 | <b>A</b>  | 19.91                                  | 0.15                                         | 6  | 14.54        |
|     | <b>A'</b> | 19.46                                  | 0.63                                         | 13 | 13.12        |
|     | <b>B</b>  | 18.45                                  | 0.54                                         | 5  | 13.28        |
| 380 | <b>A</b>  | 19.83                                  | 0.12                                         | 4  | 14.72        |
|     | <b>A'</b> | 19.42                                  | 0.28                                         | 5  | 13.93        |
|     | <b>B</b>  | 18.85                                  | 1.37                                         | 15 | 12.35        |
| 400 | <b>A</b>  | 19.66                                  | 0.20                                         | 5  | 14.24        |
|     | <b>A'</b> | 19.42                                  | 0.07                                         | 2  | 15.31        |
|     | <b>B</b>  | 19.02                                  | 1.02                                         | 13 | 12.65        |
| 430 | <b>A</b>  | 19.74                                  | 0.03                                         | 2  | 16.02        |
|     | <b>A'</b> | 19.58                                  | 0.62                                         | 16 | 13.14        |
|     | <b>B</b>  | 18.65                                  | 1.13                                         | 7  | 13.47        |

<sup>a</sup>  $^1\text{H}$  NMR chemical shift and line width are in ppm. The temperature and area are in K and arbitrary unit, respectively.  $\delta_{\text{H}^+}^{\text{corr,MD}}$  =  $^1\text{H}$  NMR chemical shift;  $\Delta\delta_{\text{H}^+}^{\text{corr,MD}}$  =  $^1\text{H}$  NMR line width; **A** and **A'** = oscillatory shuttling peaks; **B** = structural diffusion peak; T = temperature; I = area under the Lorentzian peak function.
